# Supplementary material
Source: Springer Nature journal article supplement (https://www.springermedizin.de/resource/supplementary/12911_2012_605_MOESM1_ESM.pdf/9525860)
Supplement: MOESM1 [file 9525860]

# Process

# Artifacts

**1. Create Knowledge Specification**

- Reference Content
- Workflow, Business Rules, Use Cases
- Knowledge Specifications, Metadata

**2. Integrate with Terminology**

- Standard Terminologies
- Local Terminologies
- Commercial Content

**3. Author Rules**

- Enterprise Rules
- Local Rules

**4. Test Rules**

- Test Scenarios
- Test Scripts
- Test data

**5. Publish Rules**

- Executable Rules
- Rule Specifications (e.g., PDF files and screen shots)

**6. Reporting**

- Analytical Reports
- Usage Reports
- Audit Reports
